# Supplementary material for: Effects of mixing two legume species at seedling stage under different environmental conditions
Source: PeerJ journal article supplement (doi:10.7717/peerj.10615), 2021-02-02
Supplement: Figure_S1_Exp._design_Field_2016-17_Germination.pdf [file Figure_S1_Exp._design_Field_2016-17_Germination.pdf]

- **Two legume species: alsike clover (AC) and black medic (BM)**

**Factor 1 (DIV): 3 diversity treatments of AC:BM ratio**

**DIV1:** mono (100:0)

**DIV2:** Mix (50: 50)

**DIV3:** mono (0:100)

**Factor 2 (Den): 3 seed densities (of the recommended seed density ;%)**

**Den1:** 50%, **Den2:** 100%, **Den3:** 150%

- 2 years (**y1:** 2016, **y2:** 2017)

**sampling areas in half plot**

in 2017

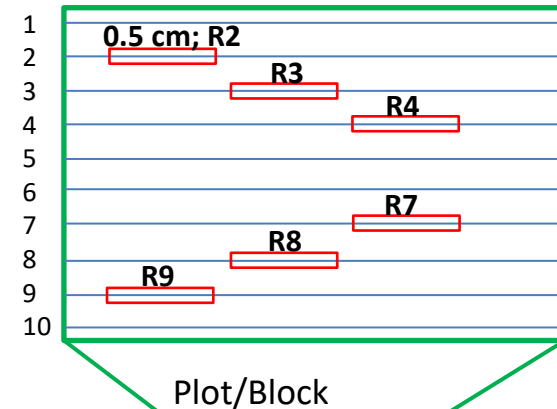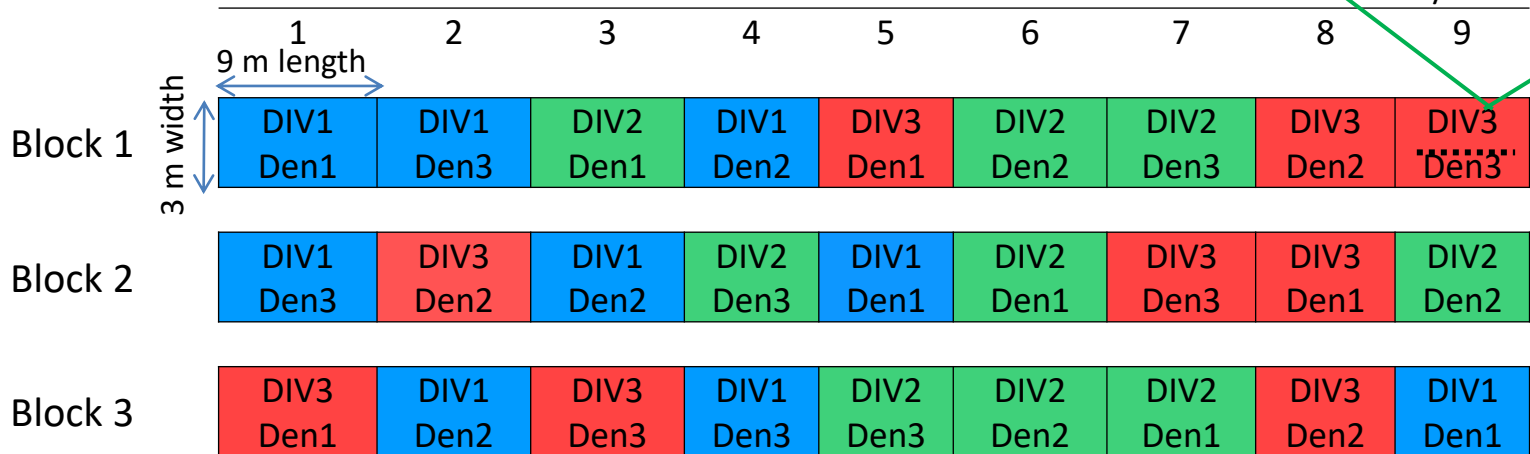

..... The dashed line indicates splitting of each plot into 2 parts; each contains 10 rows.

Number of samplings per density were:

In 2016 = 8 rows /plot x 3 blocks = 24

In 2017 = 12 rows/plot x 4 blocks = 48
