# Supplementary material for: Effects of mixing two legume species at seedling stage under different environmental conditions
Source: PeerJ journal article supplement (doi:10.7717/peerj.10615), 2021-02-02

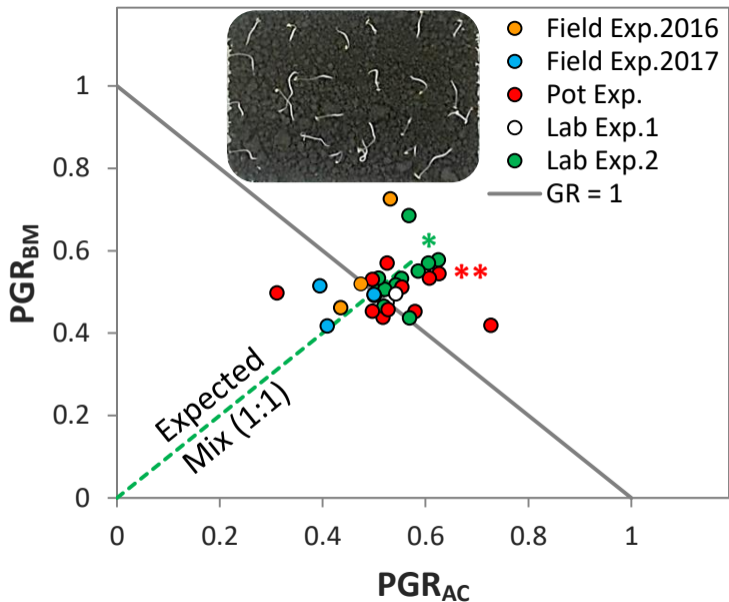

Supplement: Figure_S3_Graphical_abstract_v1.pdf [file Figure_S3_Graphical_abstract_v1.pdf]
